# Supplementary material for: Butyrate Producers as Potential Next-Generation Probiotics: Safety Assessment of the Administration of Butyricicoccus pullicaecorum to Healthy Volunteers
Source: PubMed Central journal article supplement (PMC6222043; doi:10.1128/msystems.00094-18), 2018-11-06
Supplement: sys006182288st1.pdf [file sys006182288st1.pdf]

**Supplemental Table S1:** Probiotic and placebo effects on bowel habits and blood chemistry parameter (hematology values, liver and kidney functioning, blood minerals and lipids) measured after 4 weeks of intake

Values are expressed as mean ( $\pm$  SD) and were compared with paired two-sample t-tests when the normality assumption was met. If not, data are represented as median [IQR] and were compared with Wilcoxon signed rank tests. p-values are not corrected for multiple testing

| Type         | Parameter                                                              | $\Delta$ Probiotic (end - start) | $\Delta$ Placebo (end - start) | p-value |
|--------------|------------------------------------------------------------------------|----------------------------------|--------------------------------|---------|
| Bowel habits | Number of stools per day (Daily)                                       | 0 [-0.04,0.43]                   | 0 [-0.19,0.28]                 | 0.517   |
| Bowel habits | Bristol stool score (1=separate hard lumps, 7=watery stool) (Daily)    | 0.03 [-0.26,0.36]                | 0.1 [-0.25,0.42]               | 0.885   |
| Bowel habits | Abdominal pain (0=no, 100=whole day) (Daily)                           | 0 [-0.25,2]                      | 0 [-1,2.25]                    | 0.59    |
| Bowel habits | Severity abdominal pain (0=no, 100=unbearable) (Daily)                 | 0 [-0.25,1.25]                   | 0 [-1.25,1.25]                 | 0.736   |
| Bowel habits | Severity bloating (0=no, 100=unbearable) (Daily)                       | 0 [-3,2.25]                      | 0 [-3.25,0.25]                 | 0.761   |
| Bowel habits | Stool consistency (0=watery, 100=very hard) (Daily)                    | 0.64 ( $\pm$ 13.57)              | -1.71 ( $\pm$ 8.8)             | 0.357   |
| Bowel habits | Influence abdominal complaints on life (0=no, 100= completely) (Daily) | 0 [0,3]                          | 0 [-0.25,2]                    | 0.569   |
| Bowel habits | Abdominal pain: Number of days (Weekly)                                | 0 [0,0]                          | 0 [-0.25,0]                    | 0.806   |
| Bowel habits | Abdominal pain: Severity (0=no, 100=unbearable) (Weekly)               | 0 [0,1.25]                       | 0 [-4.25,5.25]                 | 0.508   |
| Bowel habits | Abdominal pain: Severity worst period (0=no, 100=unbearable) (Weekly)  | 0 [-2,0.25]                      | 0 [-3,2]                       | 0.251   |
| Bowel habits | Bloating: Number of days (Weekly)                                      | 0 [0,1]                          | 0 [-0.25,0]                    | 0.168   |
| Bowel habits | Bloating: Severity (0=no, 100=unbearable) (Weekly)                     | 0 [0,2]                          | 0 [-5.75,0.25]                 | 0.862   |
| Bowel habits | Bloating: Severity worst period (0=no, 100=unbearable) (Weekly)        | 0 [-2.25,3.75]                   | 0 [-8,3.25]                    | 0.676   |
| Bowel habits | Stool: Watery (number of days) (Weekly)                                | 0 [-0.25,0]                      | 0 [0,0]                        | 0.497   |
| Bowel habits | Stool: Hard lumps (number of days) (Weekly)                            | 0 [0,0]                          | 0 [0,0]                        | 0.564   |
| Bowel habits | Stool: Hurry to reach toilet (number of days) (Weekly)                 | 0 [0,0]                          | 0 [0,1]                        | 0.869   |
| Bowel habits | Stool: Difficult straining (number of days) (Weekly)                   | 0 [0,0]                          | 0 [0,0]                        | 0.782   |
| Bowel habits | Stool: Incomplete defecation feelings (number of days) (Weekly)        | 0 [0,0]                          | 0 [0,0]                        | 0.957   |
| Bowel habits | Stool: Severity stool problems (0=no, 100=unbearable) (Weekly)         | 0 [-3.25,2]                      | 0 [-0.75,8.5]                  | 0.761   |

|                             |                                                                         |                   |                    |           |
|-----------------------------|-------------------------------------------------------------------------|-------------------|--------------------|-----------|
| Bowel habits                | General: Abdominal complaints influenced life (number of days) (Weekly) | 0 [0,0]           | 0 [0,0.25]         | 0.593     |
| Bowel habits                | General: Severity abdominal pain (0=no, 100=unbearable) (Weekly)        | 0 [-2.25,3.25]    | 0 [-0.75,6.5]      | 0.386     |
| Bowel habits                | General: Abdominal complaints (0=no, 100=unbearable)                    | 0 [-1.75,2.25]    | 0 [0,5.25]         | 0.503     |
| Haematological parameters   | Haemoglobin [g/dL]                                                      | 0.05 (± 0.62)     | -0.29 (± 0.68)     | 0.065     |
| Haematological parameters   | Haematocrit                                                             | 0 [-0.01,0.01]    | -0.01 [-0.02,0.01] | 0.119     |
| Haematological parameters   | Red blood cell (RBC) count [10 <sup>12</sup> /L]                        | 0.01 (± 0.18)     | -0.06 (± 0.18)     | 0.147     |
| Haematological parameters   | Mean corpuscular volume (MCV) [fL]                                      | 0.03 (± 1.07)     | 0.17 (± 0.95)      | 0.64      |
| Haematological parameters   | Mean content of haemoglobin (MCH) [pg]                                  | 0 [-0.33,0.4]     | 0 [-0.5,0.1]       | 0.191     |
| Haematological parameters   | Mean corpuscular haemoglobin concentration (MCHC) [g/dL]                | 0 [-0.25,0.5]     | -0.2 [-0.53,0.1]   | 0.183     |
| Haematological parameters   | Random distribution of RBC weight (RDW) [%]                             | 0 [-0.2,0.1]      | 0 [-0.23,0.2]      | 0.709     |
| Haematological parameters   | White blood cell count [10 <sup>9</sup> /L]                             | 0.32 [-0.28,0.65] | -0.35 [-1.08,0.3]  | 0.104     |
| Haematological parameters   | Platelet count [10 <sup>9</sup> /L]                                     | 4.04 (± 21.77)    | 0.14 (± 20.68)     | 0.465     |
| Haematological parameters   | Mean platelet volume (MPV) [fL]                                         | 0.10 (± 0.27)     | 0.03 (± 0.38)      | 0.45      |
| Liver and kidney parameters | Albumin [g/L]                                                           | 0.07 (± 2.21)     | -1.35 (± 2.58)     | 0.041 (1) |
| Liver and kidney parameters | Alkaline phosphatases [U/L]                                             | 1.43 (± 5.86)     | 0.32 (± 7.55)      | 0.569     |
| Liver and kidney parameters | Alanine aminotransferase (ALT) [U/L]                                    | 0 [-2.25,3]       | -1 [-3,1.25]       | 0.914     |
| Liver and kidney parameters | Aspartate aminotransferase (AST) [U/L]                                  | 0 [-1.5,2.5]      | -0.5 [-2,3]        | 0.809     |
| Liver and kidney parameters | Bilirubin [mg/dL]                                                       | 0.02 [-0.07,0.13] | 0.01 [-0.16,0.07]  | 0.349     |
| Liver and kidney parameters | Creatine kinase [U/L]                                                   | 2.5 [-7.5,34.75]  | 1 [-26.5, 24]      | 0.35      |
| Liver and kidney parameters | Creatinine [mg/dL]                                                      | 0.02 (± 0.06)     | -0.01 (± 0.08)     | 0.185     |
| Liver and kidney parameters | Gamma glutamyl transpeptidase (GT) [U/L]                                | 0.5 [-1,1.25]     | -0.5 [-2,1]        | 0.579     |
| Liver and kidney parameters | Glucose [mg/dL]                                                         | -0.71 (± 6.2)     | -0.04 (± 5.23)     | 0.66      |
| Liver and kidney parameters | Lactate dehydrogenase (LDH) [U/L]                                       | 10.5 [0.5,17.75]  | 6.5 [-2.75,25.75]  | 0.741     |
| Liver and kidney parameters | Total protein [g/L]                                                     | 0.71 (± 3.34)     | -1.07 (± 3.03)     | 0.044 (2) |

|                                      |                                                    |                    |                    |           |
|--------------------------------------|----------------------------------------------------|--------------------|--------------------|-----------|
| Liver and kidney function parameters | Urea [mg/dL]                                       | 0.79 (± 4.55)      | -1.5 (± 6.76)      | 0.148     |
| Blood minerals                       | Bicarbonate [mM]                                   | 0.14 (± 3.23)      | -0.13 (± 2.45)     | 0.73      |
| Blood minerals                       | Calcium [mM]                                       | -0.02 (± 0.07)     | -0.06 (± 0.06)     | 0.008 (3) |
| Blood minerals                       | Chloride [mM]                                      | -0.62 (± 1.66)     | 0.01 (± 1.79)      | 0.22      |
| Blood minerals                       | Iron [µg/dL]                                       | 9.82 (± 41.46)     | -11.04 (± 62.18)   | 0.154     |
| Blood minerals                       | Magnesium [mM]                                     | 0.01 (± 0.03)      | 0.01 (± 0.05)      | 0.899     |
| Blood minerals                       | Potassium [mM]                                     | -0.09 [-0.32,0.13] | -0.05 [-0.23-0.08] | 0.3       |
| Blood minerals                       | Sodium [mM]                                        | -0.19 (± 1.39)     | 0.1 (± 1.93)       | 0.513     |
| Blood lipids                         | Triglycerides [mg/dL]                              | -0.11 (± 28.52)    | -4.14 (± 34.01)    | 0.585     |
| Blood lipids                         | Cholesterol [mg/dL]                                | 2.21 (± 13.26)     | 0.25 (± 21.72)     | 0.683     |
| Blood lipids                         | High-density lipoprotein (HDL) cholesterol [mg/dL] | 2 [-1.25,4]        | 2 [-3.25,4.25]     | 0.484     |
| Blood lipids                         | Low-density lipoprotein (LDL) cholesterol [mg/dL]  | -1.36 (± 10.13)    | -4.18 (± 18.79)    | 0.503     |

(1) Only one subject deviated from the normal range (35-52 g/L; 52.4 g/L), and this was at the end of the placebo

(2) No subject deviated from the normal range (70-150 g/L)

(3) Only one subject deviated from the normal range (2.15-2.55 mM; 2.6 mM), and this was at the start of the placebo intervention period
