# Supplementary material for: Butyrate Producers as Potential Next-Generation Probiotics: Safety Assessment of the Administration of Butyricicoccus pullicaecorum to Healthy Volunteers
Source: PubMed Central journal article supplement (PMC6222043; doi:10.1128/msystems.00094-18), 2018-11-06
Supplement: sys006182288st2.pdf [file sys006182288st2.pdf]

**Supplemental Table S2:** Differences in relative abundances of microbial genera after probiotic administration (end - start) compared to placebo (end - start) (Wilcoxon signed rank tests)

| Genus                     | Z.statistic | effect.size.r | p-value  | FDR      |
|---------------------------|-------------|---------------|----------|----------|
| Paraprevotella            | 2.64        | 0.35          | 6.81E-03 | 4.02E-01 |
| Anaerostipes              | -2.37       | -0.32         | 1.60E-02 | 4.73E-01 |
| Blautia                   | -2.10       | -0.28         | 3.46E-02 | 5.48E-01 |
| Odoribacter               | 2.07        | 0.28          | 3.71E-02 | 5.48E-01 |
| Coprobacter               | -1.79       | -0.24         | 7.42E-02 | 6.97E-01 |
| Dorea                     | -1.67       | -0.22         | 9.65E-02 | 6.97E-01 |
| Terrisporobacter          | -1.57       | -0.21         | 1.24E-01 | 6.97E-01 |
| Clostridium_XVIII         | -1.56       | -0.21         | 1.21E-01 | 6.97E-01 |
| Turicibacter              | -1.52       | -0.20         | 1.35E-01 | 6.97E-01 |
| EscherichiaShigella       | -1.46       | -0.20         | 1.50E-01 | 6.97E-01 |
| Coprococcus               | -1.44       | -0.19         | 1.54E-01 | 6.97E-01 |
| Senegalimassilia          | 1.75        | 0.23          | 8.30E-02 | 6.97E-01 |
| Butyricimonas             | 1.83        | 0.24          | 6.74E-02 | 6.97E-01 |
| Clostridium_sensu_stricto | -1.22       | -0.16         | 2.31E-01 | 7.90E-01 |
| Intestinimonas            | -1.19       | -0.16         | 2.42E-01 | 7.90E-01 |
| Bilophila                 | -1.10       | -0.15         | 2.79E-01 | 7.90E-01 |
| Ruminococcus2             | -1.06       | -0.14         | 3.03E-01 | 7.90E-01 |
| Megasphaera               | -0.95       | -0.13         | 3.57E-01 | 7.90E-01 |
| Butyricoccus              | -0.93       | -0.12         | 3.63E-01 | 7.90E-01 |
| Sutterella                | -0.91       | -0.12         | 3.71E-01 | 7.90E-01 |
| Bacteroides               | -0.91       | -0.12         | 3.75E-01 | 7.90E-01 |
| Prevotella                | 0.99        | 0.13          | 3.34E-01 | 7.90E-01 |
| Alloprevotella            | 1.05        | 0.14          | 3.03E-01 | 7.90E-01 |
| Enterococcus              | 1.11        | 0.15          | 3.44E-01 | 7.90E-01 |
| Fusobacterium             | 1.13        | 0.15          | 2.66E-01 | 7.90E-01 |
| Methanobrevibacter        | 1.13        | 0.15          | 2.66E-01 | 7.90E-01 |
| Akkermansia               | 1.17        | 0.16          | 2.49E-01 | 7.90E-01 |
| Slackia                   | 1.20        | 0.16          | 2.43E-01 | 7.90E-01 |
| Parasutterella            | -0.83       | -0.11         | 4.17E-01 | 7.97E-01 |
| Dialister                 | -0.74       | -0.10         | 4.69E-01 | 7.97E-01 |
| Fusicatenibacter          | -0.74       | -0.10         | 4.69E-01 | 7.97E-01 |
| Parabacteroides           | -0.71       | -0.10         | 4.91E-01 | 7.97E-01 |
| Intestinibacter           | -0.70       | -0.09         | 4.94E-01 | 7.97E-01 |
| Clostridium_XIVa          | -0.69       | -0.09         | 5.03E-01 | 7.97E-01 |
| Clostridium_IV            | -0.67       | -0.09         | 5.13E-01 | 7.97E-01 |
| Desulfovibrio             | 0.74        | 0.10          | 4.75E-01 | 7.97E-01 |
| Streptococcus             | 0.74        | 0.10          | 4.68E-01 | 7.97E-01 |
| Holdemanella              | 0.83        | 0.11          | 4.14E-01 | 7.97E-01 |
| Megamonas                 | 0.58        | 0.08          | 5.73E-01 | 8.25E-01 |
| Faecalicoccus             | 0.60        | 0.08          | 5.63E-01 | 8.25E-01 |

|                       |          |          |          |          |
|-----------------------|----------|----------|----------|----------|
| Faecalibacterium      | 0.63     | 0.08     | 5.46E-01 | 8.25E-01 |
| Gemmiger              | -0.47    | -0.06    | 6.48E-01 | 8.33E-01 |
| Lactobacillus         | -0.47    | -0.06    | 6.60E-01 | 8.33E-01 |
| Bifidobacterium       | 0.46     | 0.06     | 6.63E-01 | 8.33E-01 |
| Phascolarctobacterium | 0.46     | 0.06     | 6.58E-01 | 8.33E-01 |
| Lactococcus           | 0.49     | 0.07     | 6.56E-01 | 8.33E-01 |
| Barnesiella           | 0.51     | 0.07     | 6.18E-01 | 8.33E-01 |
| Acidaminococcus       | 0.37     | 0.05     | 7.22E-01 | 8.88E-01 |
| Romboutsia            | -0.34    | -0.05    | 7.41E-01 | 8.93E-01 |
| Alistipes             | -0.30    | -0.04    | 7.74E-01 | 9.07E-01 |
| Ruminococcus          | 0.29     | 0.04     | 7.84E-01 | 9.07E-01 |
| Flavonifractor        | -0.22    | -0.03    | 8.38E-01 | 9.35E-01 |
| Collinsella           | -0.20    | -0.03    | 8.50E-01 | 9.35E-01 |
| Clostridium_XIVb      | -0.19    | -0.03    | 8.59E-01 | 9.35E-01 |
| Veillonella           | -0.17    | -0.02    | 8.72E-01 | 9.35E-01 |
| Victivallis           | 0.12     | 0.02     | 9.16E-01 | 9.65E-01 |
| Oscillibacter         | 0.09     | 0.01     | 9.39E-01 | 9.71E-01 |
| Roseburia             | 0.00E+00 | 0.00E+00 | 1.00E+00 | 1.00E+00 |
| Sporobacter           | 0.01     | 1.96E-03 | 1.00E+00 | 1.00E+00 |
